# Supplementary material
Source: HighWire-hosted journal article supplement (https://jnis.bmj.com/highwire/filestream/176343/field_highwire_adjunct_files/0/jnis-2022-019152supp001_data_supplement.pdf)
Supplement: jnis-2022-019152supp001_data_supplement.pdf [file jnis-2022-019152supp001_data_supplement.pdf]

| <b>Baseline characteristics</b>       | <u>Interventional CVP cohort</u> (N=3) | <u>Surgical CVP cohort</u> (N=8) |
|---------------------------------------|----------------------------------------|----------------------------------|
| Age in years (mean±SD)                | 79.7 (3.5)                             | 67.6 (17.4)                      |
| Female (%)                            | 3 (100)                                | 5 (62.5)                         |
| Arterial hypertension (%)             | 3 (100)                                | 7 (87.5)                         |
| Diabetes mellitus (%)                 | -                                      | 5 (62.5)                         |
| Hyperlipoproteinemia (%)              | 3 (100)                                | 4 (50.0)                         |
| Atrial fibrillation (%)               | 1 (33.3)                               | 2 (25.0)                         |
| <b>Stroke characteristics</b>         |                                        |                                  |
| Prestroke mRS score (median; Q1, Q3)  | 0.0 (0.0, 0.0)                         | 0.0 (0.0, 0.0)                   |
| NIHSS at onset (median; Q1, Q3)       | 19 (13, 22)                            | 23 (14, 32)                      |
| ASPECTS (median; Q1, Q3)              | 5.0 (5.0, 6.0)                         | 8.0 (7.0, 9.0)                   |
| Intravenous tPA (%)                   | -                                      | 1 (12.5)                         |
| <b>Location of occlusion</b>          |                                        |                                  |
| Tandem occlusion (%)                  | -                                      | 1 (12.5)                         |
| ICA (%)                               | -                                      | 1 (12.5)                         |
| M1 proximal (%)                       | 1 (33.3)                               | 2 (25.0)                         |
| M1 distal (%)                         | 1 (33.3)                               | -                                |
| M2 (%)                                | 1 (33.3)                               | -                                |
| Posterior circulation (%)             | -                                      | 4 (50.0)                         |
| <b>Outcome</b>                        |                                        |                                  |
| mRS score at 90 days (median; Q1, Q3) | 4.0 (3.5, 5)                           | 5.5 (4, 6)                       |
| Mortality at 90 days (%)              | 1 (33.3)                               | 4 (50.0)                         |
| Good outcome (%)                      | 0 (0.0)                                | 2 (25.0)                         |

**Table S1: Baseline characteristics and outcome of patients with stroke after cardiovascular procedures divided into an interventional cohort (without use of cardiopulmonary bypass) and a surgical cohort (with use of cardiopulmonary bypass).** Categorical variables are shown as absolute numbers and percentages. Continuous

variables are described by mean  $\pm$  standard deviation (SD) or median and the 1st and 3rd Quartile (Q1, Q3). *ASPECTS* Alberta stroke programme early CT score; *ICA* intracranial carotid artery; *mRS* modified Rankin scale; *M1* first segment of middle cerebral artery; *M2* second segment of middle cerebral artery; *NIHSS* National Institutes of Health Stroke Scale; *tPA* tissue plasminogen activator.
